1 Protein-bound molybdenum cofactor is bioavailable and rescues molybdenum cofactor-deficient  
2 *C. elegans*  
3

4 Kurt Warnhoff<sup>a,b,d</sup>, Thomas W. Hercher<sup>c,d</sup>, Ralf R. Mendel<sup>c</sup>, Gary Ruvkun<sup>a,b</sup>

5 a Department of Molecular Biology, Massachusetts General Hospital, Boston, MA 02114

6 b Department of Genetics, Harvard Medical School, Boston, MA 02115

7 c Braunschweig University of Technology, Braunschweig, Germany

8 d These authors contributed equally

9 Corresponding authors: [ruvkun@molbio.mgh.harvard.edu](mailto:ruvkun@molbio.mgh.harvard.edu) and [r.mendel@tu-bs.de](mailto:r.mendel@tu-bs.de)

10

11 **Keywords:** molybdenum cofactor, sulfite oxidase, *C. elegans*, *E. coli*

12

13 **Abstract:**

14 The molybdenum cofactor (Moco) is a 520 dalton prosthetic group that is synthesized in a multi-  
15 step enzymatic pathway present in most Archaea, Bacteria, and Eukarya. In animals, four  
16 oxidases (among them sulfite oxidase) use Moco as a prosthetic group. Moco is essential in  
17 animals; humans with mutations in genes that encode Moco-biosynthetic enzymes display lethal  
18 neurological and developmental defects. Moco supplementation seems a logical therapy,  
19 however the instability of Moco has precluded biochemical and cell biological studies of Moco  
20 transport and bioavailability. The nematode *Caenorhabditis elegans* can take up Moco from its  
21 bacterial diet and transport it to cells and tissues that express Moco-requiring enzymes,  
22 suggesting a system for Moco uptake and distribution. Here we show that protein-bound Moco  
23 is the stable, bioavailable species of Moco taken up by *C. elegans* from its diet and is an  
24 effective dietary supplement in a *C. elegans* model of Moco deficiency. Diverse purified  
25 Moco:protein complexes from bacteria, bread mold, green algae, and dairy cows were able to  
26 support the growth of otherwise Moco-deficient *C. elegans* mutants grown on Moco-deficient *E.*  
27 *coli*. We show that these Moco:protein complexes are very stable, suggesting they may provide  
28 a strategy for the production and delivery of therapeutically active Moco to treat human Moco  
29 deficiency.

30

31

32

33

34

35

## 36 Introduction:

37 The molybdenum cofactor (Moco) is an ancient coenzyme that was present in the last  
38 universal common ancestor and that continues to be synthesized in all domains of life (1, 2).  
39 Moco is a pterin-based organic prosthetic group that is comprised of a C6-substituted pyrano  
40 ring, a terminal phosphate, and a dithiolate group binding to molybdenum (**Fig. 1A**) (3). In  
41 humans and other animals, Moco is required for the activity of 4 enzymes: sulfite oxidase,  
42 xanthine oxidase, aldehyde oxidase, and mitochondrial amidoxime reducing component (4).  
43 There are 2 forms of eukaryotic Moco, the sulfite oxidase form and the xanthine oxidase form  
44 (**Fig. 1A**). These Moco species differ in the third Mo-S ligand which is provided either by an  
45 enzyme-derived cysteine residue (sulfite oxidase form) or an inorganic sulfur (xanthine oxidase  
46 form) (4). The xanthine oxidase form of Moco is synthesized from the sulfite oxidase form via  
47 the enzyme Moco sulfurase (**Fig. 1A**) (5).

48 Both forms of Moco are synthesized by a highly conserved biosynthetic pathway (**Fig.**  
49 **1A**) (6). The genes necessary for Moco biosynthesis were first elucidated by genetic studies of  
50 chlorate resistance in bacteria (7). The importance of Moco biosynthesis to human health is  
51 highlighted by Moco deficiency (MoCD), a rare inborn error of metabolism. MoCD is caused by  
52 loss-of-function mutations in genes encoding any of the human Moco-biosynthetic enzymes and  
53 results in severe neurological dysfunction and neonatal lethality (8, 9). MoCD patients with  
54 mutations in MOCS1 (orthologous to bacterial *moaA* and *moaC*) can be treated with cyclic  
55 pyranopterin monophosphate (cPMP), a stable intermediate in Moco biosynthesis immediately  
56 downstream of MOCS1 (10). However, cPMP treatment is not effective for patients with  
57 mutations in any of the downstream Moco-biosynthetic enzymes. Purification and delivery of  
58 mature Moco would be an ideal therapeutic strategy for treating all forms of MoCD, however  
59 free Moco is too unstable and oxygen-sensitive to be purified and therapeutically administered.  
60 Furthermore, it is unclear whether mature Moco can cross cellular membranes.

61 Genetic evidence demonstrates that the nematode *C. elegans* retrieves Moco as well as  
62 cPMP from its bacterial diet, *E. coli* (11). However, nothing was known about the biochemical  
63 mechanism of Moco transfer between these 2 highly divergent organisms. (11). Here we  
64 propose that Moco bound to protein is the stable and bioavailable Moco species that is being  
65 harvested by *C. elegans*. We demonstrate that supplementation of purified protein-bound Moco  
66 rescues the lethality of Moco-deficient *C. elegans* feeding on Moco-deficient *E. coli*. We show  
67 that Moco bound to diverse Moco-containing proteins originating from bacteria, algae, fungi, and  
68 mammals, is bioavailable to *C. elegans*, and that this supplementation does not require Moco  
69 biosynthetic enzymes in *C. elegans* or its bacterial diet. This work suggests future mammalian

70 therapeutic studies of supplemental protein-bound Moco and highlights the existence of a  
71 pathway for Moco transport and harvest.

72

## 73 **Results and Discussion:**

### 74 *C. elegans* acquires Moco from dietary *E. coli*:

75 Due to its instability, Moco has long been thought to be synthesized and utilized cell  
76 autonomously with no evidence for transport between cells, tissues, and organisms. So far only  
77 *C. elegans* has been described to have 2 pathways by which it can obtain Moco: endogenous  
78 Moco biosynthesis from GTP or dietary uptake of Moco, which demands other genetic pathways  
79 of intestinal uptake from the bacterial diet and transport of Moco to client tissues (11). Moco-  
80 biosynthetic enzymes are conserved in all domains of life; in *C. elegans* these enzymes are  
81 encoded by *moc-1*, *moc-2*, *moc-3*, *moc-4*, and *moc-5* that mediate sequential steps in Moco  
82 biosynthesis (**Fig. 1A**). Using mutations in the *C. elegans* *moc* genes (i.e. the *moc-1(ok366)* null  
83 mutation) Moco biosynthesis can be interrupted in all cells. In the laboratory, *C. elegans* feed on  
84 a monoculture of *E. coli*. Thus, we can also use mutations in any of the genes of the *E. coli*  
85 Moco-biosynthetic pathway to eliminate dietary Moco (i.e. the  $\Delta$  *moaA* null mutation). Either  
86 endogenous Moco synthesis in *C. elegans* or Moco produced by the diet *E. coli* and then  
87 consumed by *C. elegans* can support growth, development, and reproduction of *C. elegans*.  
88 However, when *C. elegans* cannot synthesize their own Moco and cannot obtain Moco from  
89 their diet, they arrest in larval development and ultimately die due to inactivity of sulfite oxidase,  
90 the key Moco-utilizing enzyme in animals (11).

91 To test how much wild-type, Moco-producing bacteria was required to support growth  
92 and development of *C. elegans* defective in Moco biosynthesis, we mixed wild-type and  $\Delta$  *moaA*  
93 mutant *E. coli* at various ratios and tested for the ability of these mixtures to support the viability  
94 of *moc-1* mutant *C. elegans*. We speculated that if Moco functions like a vitamin, only trace  
95 amounts of wild-type, Moco-producing bacteria would be needed to support *moc-1* mutant  
96 viability. However, we found that about 30% of the bacterial diet needed to be wild type (Moco  
97 producing) to support growth and development of *moc-1* mutant animals (**Fig. 1B**).

98

### 99 Diverse protein-bound Moco is taken up and utilized by *C. elegans*:

100 We hypothesized that *C. elegans* harvest bacterial Moco that is stably bound within the  
101 *E. coli* Moco-utilizing enzymes. *E. coli* YiiM (*EcYiiM*) is one such Moco-utilizing enzyme and  
102 mediates the reduction of N-hydroxylated substrates (12, 13). To test whether Moco bound to  
103 *EcYiiM* can be absorbed by *C. elegans*, we purified recombinant *EcYiiM* protein from *E. coli* and

104 used it to supplement the diet of Moco-biosynthetic mutant *C. elegans* feeding on Moco-  
105 deficient *E. coli*, growth conditions that would otherwise result in 100% larval arrest and death.  
106 Consistent with the model that *C. elegans* utilizes Moco from *E. coli* Moco-utilizing enzymes,  
107 *moc-1* mutant animals grown on Moco-deficient *E. coli* grew and developed well when their diet  
108 was supplemented with *EcYiiM*-bound Moco. (**Fig. 2A,B**). Thus, *EcYiiM*-bound Moco is  
109 bioavailable and can support the viability of otherwise Moco-deficient *C. elegans*.

110 To test if the ability of *C. elegans* to harvest Moco from protein was more general to other  
111 Moco-binding proteins, we recombinantly expressed and purified two additional Moco-binding  
112 proteins in *E. coli*; nitrate reductase from the red bread mold *Neurospora crassa* (*NcNR*) and  
113 Moco-carrier protein from the green algae *Volvox carteri* (*VcMCP*) (14-16). We also utilized the  
114 commercially available Moco-using enzyme xanthine oxidase (*BtXO*) purified from bovine milk  
115 (17). Each Moco-binding protein was supplemented to *moc-1* mutant *C. elegans* fed  $\Delta moaA$   
116 mutant *E. coli*. Similar to *EcYiiM*, supplementation with Moco bound to either *VcMCP* or *NcNR*  
117 supported the growth of *moc-1* mutant *C. elegans* in the absence of any other dietary Moco  
118 (**Fig. 2**). To a lesser extent, *BtXO* supplementation also supported the growth of *moc-1* mutant  
119 animals cultured on Moco-deficient *E. coli* (**Fig. 2A,B**). A possible explanation for the reduced  
120 efficacy of supplemental *BtXO* compared to *EcYiiM*, *VcMCP*, or *NcNR* might be the form of  
121 Moco that is bound by these proteins. *BtXO* binds the xanthine oxidase form of Moco while  
122 *EcYiiM*, *VcMCP*, and *NcNR* bind the sulfite oxidase form of Moco (**Fig. 1A**) (12, 15, 16, 18). In  
123 *C. elegans* and other animals sulfite oxidase (*SUOX-1*) is the key Moco-requiring enzyme  
124 necessary for viability; *suox-1* null mutant animals arrest development similar to Moco-deficient  
125 animals (11). It is reasonable that protein supplementation with the sulfite oxidase form of Moco  
126 can supply the appropriate Moco to support *C. elegans* *SUOX-1* activity compared to a xanthine  
127 oxidase form of Moco. Alternatively, supplementation with the sulfite oxidase form of Moco may  
128 result in the partial conversion, via Moco sulfurase (encoded by *C. elegans* *mocs-1*), of that  
129 supplemental Moco into the xanthine oxidase form (**Fig. 1A**). Thus, by providing the sulfite  
130 oxidase form of Moco we may be providing both forms of eukaryotic Moco making it a more  
131 effective treatment for complete Moco deficiency in *C. elegans*. Supplementation with the  
132 xanthine oxidase form of Moco would likely not result in synthesis of the sulfite oxidase form of  
133 Moco as there is no known enzyme that desulfurates the xanthine oxidase form of Moco.

134 To further demonstrate that the growth of *C. elegans* *moc-1* mutant animals was  
135 conferred by supplementation of the Moco prosthetic group and not by the supplemental purified  
136 proteins, we purified apo-*VcMCP* from bacteria unable to synthesize Moco. Supplemental apo-  
137 *VcMCP*, did not support the growth of *moc-1* mutant *C. elegans* fed  $\Delta moaA$  mutant *E. coli* (**Fig.**

138 **2A,C,D**). Taken together these data demonstrate that the animal *C. elegans* is able to acquire  
139 and harvest the Moco prosthetic group when it is provided as a dietary supplement in complex  
140 with Moco-binding proteins. These proteins have diverse structures and functions and originate  
141 from both prokaryotes and eukaryotes. As such, the acquisition of protein-bound Moco by *C.*  
142 *elegans* is not specific to certain Moco-binding proteins and may reflect a general strategy for  
143 acquisition of functional Moco from the animals' diet or microbiome. Furthermore, as Moco  
144 biosynthesis and utilization are ancient processes conserved in all domains of life, we believe it  
145 is unlikely that a novel biochemical pathway for Moco transfer across cell membranes has  
146 evolved exclusively in the nematode *C. elegans*. However, it remains to be tested whether  
147 protein-bound Moco can permeate the cells of other organisms. The remaining experiments  
148 were all performed with supplemental Moco bound to VcMCP due to its well-characterized role  
149 in Moco binding and our established protocols for its production (14, 16).

150 One model for the rescue of *C. elegans* Moco deficiency is that supplemental protein-  
151 bound Moco is directly ingested by *C. elegans*. Alternatively, the protein-bound Moco may first  
152 be taken up by *E. coli* which may process the Moco to then be ingested by *C. elegans*. To  
153 distinguish between these models, we grew  $\Delta moaA$  mutant *E. coli* in lysogeny broth (LB)  
154 supplemented with Moco bound to VcMCP. This  $\Delta moaA$  *E. coli* was then separated from the  
155 culture medium by centrifugation, washed extensively, and fed to *moc-1* mutant *C. elegans*  
156 ("Diet B", **Fig. 3**). Although cultured with Moco bound to VcMCP, the washed  $\Delta moaA$  *E. coli* in  
157 Diet B did not support growth of *moc-1* mutant animals. Importantly, the supernatant medium  
158 from the same culture supported the growth of *moc-1* mutant *C. elegans* grown on a lawn of  $\Delta$   
159 *moaA* *E. coli* grown separately in LB alone ("Diet A", **Fig. 3B**). Together, these data suggest that  
160 supplemental protein-bound Moco does not pass through a bacterial intermediate before being  
161 acquired by *C. elegans* (**Fig. 3B**).

162

#### 163 Moco bound to protein is stable:

164 The instability and oxygen sensitivity of Moco has limited cell biological studies of Moco  
165 transport and precluded it from therapeutic consideration (19). The VcMCP-bound Moco used in  
166 "Diet A" (**Fig. 3**) was incubated at 37°C overnight, and still retained its activity and bioavailability,  
167 suggesting remarkable stability. To biochemically demonstrate the stability of Moco bound to  
168 protein, we measured the ability of mature Moco to stay in complex with VcMCP, *EcYiiM*, *NcNR*,  
169 and *BtXO* over time (**Fig. 4**). Free Moco is highly unstable, however it can be oxidized to 'Form  
170 A', a stable and fluorescent Moco-derivative that is quantifiable via HPLC (20, 21). Using

171 measurements of Form A and protein concentration, we first determined the initial Moco  
172 occupancy of purified VcMCP (22%) as well as *EcYiiM* (4%), *NcNR* (50%), and *BtXO* (50%)  
173 (**Fig. 4A,B**). We then assessed the stability of each purified Moco:protein complex by  
174 determining Moco retention over time at different temperatures (**Fig. 4C-F**). All 4 Moco:protein  
175 complexes were remarkably stable, showing no significant protein degradation and retaining  
176 between 43 and 83% of their original Moco content after 96 hours of incubation at ambient  
177 temperature (**Fig. 4C-F**). This stability is surprising and suggests purification of protein-bound  
178 Moco as a new strategy for the production and delivery of therapeutically active Moco to treat  
179 MoCD.

180

181 Bioavailability of recombinant protein-bound Moco does not depend on known Moco-  
182 biosynthetic enzymes in *E. coli* or *C. elegans*:

183 We tested if the Moco-biosynthetic enzymes are necessary for the harvesting or transport  
184 of supplemental protein-bound Moco using mutants in the dietary *E. coli*. We tested *moc-1*  
185 mutant *C. elegans* growth on wild-type bacteria, or mutant bacteria lacking the genes necessary  
186 for Moco biosynthesis (*moaA*, *moaC*, *moaD*, *moaE*, *moeB*, *mog*, *moeA*, *modA*, *modC*, or *ydaV*).  
187 *moc-1* mutant animals were grown on mutant *E. coli* with and without supplemental Moco bound  
188 to VcMCP. *moc-1* mutant *C. elegans* grew well on wild-type *E. coli* but displayed larval arrest on  
189 all 10 *E. coli* mutants defective in Moco biosynthesis (**Fig. S1**). Supplemental Moco bound to  
190 VcMCP supported growth and development of *moc-1* mutant *C. elegans* on all 10 of the Moco-  
191 biosynthetic mutant *E. coli* demonstrating that none of these *E. coli* genes were necessary for  
192 bioavailability of supplemental protein-bound Moco (**Fig. S1**).

193 Alternatively, we speculated that the Moco-biosynthetic machinery of *C. elegans* might  
194 play a role in the bioavailability of supplemental protein-bound Moco. To test this, we used  
195 established *C. elegans* mutants in the Moco-biosynthetic pathway (*moc-5*, *moc-4*, *moc-3*, *moc-*  
196 *2*, and *moc-1*, **Fig. 1A**). Each of these *C. elegans* mutants was cultured on wild-type *E. coli*,  $\Delta$   
197 *moaA E. coli*, or  $\Delta$  *moaA E. coli* supplemented with Moco bound to VcMCP. All of the *moc*  
198 mutant animals grew well on wild-type bacteria that produce Moco and arrested growth on  $\Delta$   
199 *moaA E. coli* that lacks Moco biosynthesis (**Fig. S2A-E**). Each *C. elegans moc*-mutant displayed  
200 dramatically improved growth on  $\Delta$  *moaA E. coli* when their diet was supplemented with Moco  
201 bound to VcMCP (**Fig. S2A-E**). These results demonstrate that *moc-5*, *moc-4*, *moc-3*, *moc-2*,  
202 and *moc-1* are not required for the bioavailability of supplemental protein-bound Moco. Thus,

203 the machinery that facilitates Moco transport is distinct from the canonical Moco biosynthetic  
204 pathway.

205

206 Supplemental protein-bound Moco supports the activity of *C. elegans* SUOX-1:

207 The lethality associated with Moco deficiency in *C. elegans* and humans is due to  
208 inactivity of sulfite oxidase (SUOX-1), a mitochondrial Moco-requiring enzyme that oxidizes the  
209 lethal toxin sulfite to sulfate. Like Moco-biosynthesis, sulfite oxidase is essential in both *C.*  
210 *elegans* and humans (11, 22). Thus, to rescue development of Moco-deficient *C. elegans*,  
211 supplemental protein-bound Moco must be incorporated into and support the activity of *C.*  
212 *elegans* SUOX-1. To demonstrate this, we utilized the hypomorphic *suox-1* allele *gk738847*  
213 (D391N) (23). Aspartic acid 391 of sulfite oxidase is highly conserved and is present in *C.*  
214 *elegans*, *Drosophila melanogaster*, *Danio rerio*, *Mus musculus*, and *Homo sapiens*. The SUOX-  
215 1 D391N amino acid substitution causes partial SUOX-1 loss-of-function that is enhanced when  
216 dietary Moco is absent. Growing *suox-1(gk738847)* mutant *C. elegans* on Moco-deficient *E. coli*  
217 causes a severe developmental delay compared to its growth on wild-type Moco-producing *E*  
218 *coli* (**Fig. S2F**) (11). Importantly, *suox-1(gk738847)* mutant animals are wild type for their  
219 endogenous Moco biosynthetic pathway and are able to synthesize Moco *de novo*. This result  
220 shows that *C. elegans* depends on both endogenous Moco biosynthesis as well as dietary  
221 sources of Moco to fully support the activity of SUOX-1.

222 We hypothesized that supplemental Moco bound by VcMCP would improve the viability  
223 of *suox-1(gk738847)* animals grown on  $\Delta moaA$  *E. coli*. To test this, we cultured *suox-*  
224 *1(gk738847)* mutant animals on wild-type *E. coli*,  $\Delta moaA$  *E. coli*, and  $\Delta moaA$  *E. coli*  
225 supplemented with Moco bound to VcMCP. Consistent with our rescue of *C. elegans* Moco  
226 deficiency, supplemental protein-bound Moco improved the growth of *suox-1(gk738847)*  
227 animals grown on Moco-deficient *E. coli* (**Fig. S2F**). These results suggest that exogenous  
228 protein-bound Moco is absorbed, harvested, distributed to requisite cells and tissues, and re-  
229 inserted into the *C. elegans* SUOX-1 enzyme.

230 Our data demonstrate the ability of an essential protein-packaged prosthetic group to  
231 cross cell membranes. This transfer naturally occurs between multiple organisms (i.e. from *E.*  
232 *coli* to *C. elegans*) and among the cells and tissues of a single organism; Moco absorbed in the  
233 intestine of *C. elegans* must cross multiple cell membranes to reach all of the Moco-utilizing  
234 cells and tissues. Because Moco biosynthesis is as ancient as the last universal common  
235 ancestor, it is likely that the not yet discovered Moco-transport pathway may be general to all  
236 animals, including humans. Furthermore, roughly 70% of bacterial genomes encode Moco-

237 biosynthetic enzymes making the intestinal microbiome a potential reservoir for this cofactor (2).  
238 Similarly, the human diet might also be a source of exogenous protein-bound Moco as most  
239 plants and animals synthesize and utilize Moco. Our results with the nematode *C. elegans* may  
240 stimulate future exploration of the therapeutic potential of protein-bound Moco from dietary,  
241 microbiome, or recombinant sources.

242

## 243 **Materials and Methods:**

### 244 General methods and strains:

245 *C. elegans* strains were cultured at 20°C on nematode growth medium (NGM) seeded  
246 with wild-type *Escherichia coli* unless otherwise noted (24). The wild-type strain of *C. elegans*  
247 was Bristol N2. For each linkage group, the *C. elegans* mutant strains used in this work and  
248 their associated genotypes are listed. LGI: GR2253 *moc-4(ok2571)*. LGIV: MH3266 *moc-*  
249 *3(ku300)*. LGV: GR2255 *moc-2(mg595)*. LGX: GR2254 *moc-1(ok366)*, GR2256 *moc-5(mg589)*,  
250 and GR2269 *suox-1(gk738847)*.

251 *E. coli* strains were cultured using standard methods. The wild-type strain of *E. coli* was  
252 BW25113, the parental strain of the Keio *E. coli* knockout collection (25). The *E. coli* mutants  
253 used in this work were JW0764 ( $\Delta moaA::Kan^r$ ), KJW1 ( $\Delta mog$ ), KJW2 ( $\Delta moaA$ ), KJW3 ( $\Delta$   
254 *moaC*), KJW4 ( $\Delta moaD$ ), KJW5 ( $\Delta moaE$ ), KJW6 ( $\Delta moeB$ ), KJW7 ( $\Delta moeA$ ), KJW8 ( $\Delta modA$ ),  
255 KJW9 ( $\Delta modC$ ), and KJW10 ( $\Delta ydaV$ ). KJW1-KJW10 are bacterial strains derived from the Keio  
256 *E. coli* knockout collection and have been modified using established methods to remove the  
257 kanamycin resistance cassette from each locus of interest (11, 25). Strains KJW1-KJW10 were  
258 only used to produce the data in Figure S1. JW0764 was used in all other experiments with  $\Delta$   
259 *moaA E. coli*.

### 260 *C. elegans* growth assays:

261 *C. elegans* were synchronized at the first stage of larval development (L1). L1 animals  
262 were then cultured on NGM seeded with wild-type or mutant *E. coli*. For some experiments,  
263 mutant *E. coli* was supplemented with various forms and amounts of protein-bound Moco (see  
264 Dietary supplementation with protein-bound Moco). *C. elegans* animals were then allowed to  
265 grow and develop for 48 or 72 hours (specified in Figure Legends) at 20°C. For each  
266 experiment, the sample size (n) is individual animals measured and is reported in the Figures  
267 and Figure Legends.

268 For all assays, live animals were imaged using an Axio Zoom.V16 microscope (Zeiss)  
269 equipped with an ORCA-Flash4.0 digital camera (Hamamatsu). Images were captured using



270 ZEN software (Zeiss) and processed utilizing ImageJ (NIH). Animal length was measured from  
271 the tip of the head to the end of the tail. The median and upper and lower quartiles were  
272 calculated using GraphPad Prism software.

### 273 Purification and characterization of Moco-binding proteins:

274 Moco-binding proteins were expressed and purified using standard methods (16). The  
275 full-length *yiiM* coding sequence was amplified from *Escherichia coli* DH5 $\alpha$  (*EcYiiM*) and the full-  
276 length Moco carrier protein coding sequence from *Volvox carteri* (*VcMCP*) was synthesized and  
277 codon optimized for *E. coli* (16). The coding sequence for *Neurospora crassa* nitrate reductase  
278 (*NcNR*) was shortened to include only the Moco-binding and dimerization region (amino acids  
279 113-592). The coding sequences for *EcYiiM*, *VcMCP*, and *NcNR* were inserted into the pONE-  
280 CP plasmid, producing proteins fused to a C-terminal Streptavidin tag. Streptavidin-tagged  
281 proteins were expressed using the *E. coli* strain TP1000 which accumulates the eukaryotic form  
282 of Moco due to a deletion in the Mob operon (26). As a negative control, *VcMCP* was also  
283 purified from the *E. coli* strain RK5204 which is unable to produce Moco due to a mutation in  
284 *moaE* (27). Bovine xanthine oxidase (*BtXO*) was purchased from Sigma-Aldrich (X1875, batch  
285 SLCB1289).

286 Protein concentrations were determined using absorption at 280 nm and the Pierce BCA  
287 Protein-Assay (Thermo Scientific). Absorption was measured using a Multiskan GO Microplate  
288 Spectrophotometer (Thermo Scientific). Quantification of Moco content of the proteins was  
289 conducted using HPLC-based measurements of Form A, a stable and fluorescent Moco-  
290 oxidation product (21). Stability of protein-bound Moco was assessed by incubating the  
291 Moco:protein complexes at various temperatures (4°C, 22°C, and 37°C) for 96 hours. In 24-hour  
292 intervals, protein samples were centrifuged at 4°C to remove precipitated protein and protein  
293 concentration and Moco content were determined as described above.

### 294 Dietary supplementation with protein-bound Moco:

295 Similar to standard *C. elegans* growth conditions, experiments with supplemental protein-  
296 bound Moco were performed on petri dishes filled with approximately 10ml of solidified NGM  
297 agar (24). To maximize exposure to the supplemental protein-bound Moco, we resuspended  
298 10X concentrated mutant *E. coli* with either 50 $\mu$ l of M9 minimal buffer (control) or 50 microliters  
299 of protein-bound Moco in M9. These bacterial resuspensions (with and without protein-bound  
300 Moco) were then seeded onto individual petri dishes with NGM and allowed to dry leaving a  
301 small concentrated lawn of *E. coli* roughly 1-2 centimeters in diameter. After drying,  
302 synchronized L1 *C. elegans* were seeded directly on the lawn of *E. coli* and we proceeded with  
303 *C. elegans* growth assays. To maintain consistency among the experiments with supplemental

304 protein-bound Moco, dietary *E. coli* was grown, supplemented with protein-bound Moco, and  
305 seeded fresh the same day the *C. elegans* growth assay was to begin.

306 We utilize 4 different sources of protein-bound to Moco to supplement *C. elegans* diets:  
307 *Escherichia coli* YiiM (*EcYiiM*), *Neurospora crassa* nitrate reductase (*NcNR*), *Volvox carteri*  
308 Moco carrier protein (*VcMCP*), and bovine xanthine oxidase (*BtXO*). The amount of Moco in  
309 every protein preparation was determined experimentally (see Purification and characterization  
310 of Moco-bound proteins). The independent variable in our experiments with supplemental  
311 protein-bound Moco is the total amount of Moco that is being used to resuspend the dietary *E.*  
312 *coli*. Because we do not know the extent to which the protein-bound Moco diffuses throughout  
313 the NGM agar, we are limited in our ability to estimate the concentration of protein-bound Moco  
314 to which *C. elegans* are exposed. Thus, we report the total amount of Moco used to supplement  
315 the *C. elegans* diet and assume equal protein diffusion throughout our 48-72 hour growth  
316 experiments.

#### 317 Culturing *E. coli* with Moco bound to *VcMCP*:

318  $\Delta moaA$  mutant *E. coli* (JW0764) was cultured in 500 $\mu$ l LB supplemented with 39  
319 nanomoles of Moco bound to *VcMCP*. Cells were cultured overnight at 37°C rotating at 1,400  
320 rotations per minute. This overnight culture was then concentrated and the supernatant was  
321 removed for use in “Diet A”. The concentrated cells were washed repeatedly with M9 minimal  
322 buffer, concentrated 10X, and seeded onto NGM agar plates. This diet is referred to as “Diet B”  
323 in Figure 3.

324 The supernatant from the overnight culture (see above) was then filtered through a  
325 0.20 $\mu$ m filter (Corning) to remove any remaining bacterial cells. This filtered ‘spent media’ was  
326 then used to resuspend a separate concentrated culture of  $\Delta moaA$  mutant *E. coli* (grown only  
327 in LB). These resuspended bacterial cells were then seeded onto NGM agar plates. This diet is  
328 referred to as “Diet A” in Figure 3.

329

#### 330 **Acknowledgments:**

331 We thank the *Caenorhabditis* Genetics Center (CGC) for providing *C. elegans* strains and the  
332 National BioResource Project (NIG, Japan) for providing the Keio *E. coli* knockout collection.  
333 This work was funded by an NIH Grant (5R01GM044619-26) to G.R., a DFG grant (GRK2223/1)  
334 to R.R.M., and a Damon Runyon Fellowship (DRG-2293-17) to K.W.

335

336

337

338 **References:**

- 339 1. Weiss MC, et al. (2016) The physiology and habitat of the last universal common  
340 ancestor. *Nat Microbiol* 1(9):16116–8.
- 341 2. Zhang Y, Gladyshev VN (2008) Molybdoproteomes and Evolution of Molybdenum  
342 Utilization. *Journal of Molecular Biology* 379(4):881–899.
- 343 3. Rajagopalan KV, Johnson JL (1992) The pterin molybdenum cofactors. *J Biol Chem*  
344 267(15):10199–10202.
- 345 4. Schwarz G, Mendel RR, Ribbe MW (2009) Molybdenum cofactors, enzymes and  
346 pathways. *Nature* 460(7257):839–847.
- 347 5. Bittner F, Oreb M, Mendel RR (2001) ABA3 is a molybdenum cofactor sulfurase required  
348 for activation of aldehyde oxidase and xanthine dehydrogenase in *Arabidopsis thaliana*. *J*  
349 *Biol Chem* 276(44):40381–40384.
- 350 6. Mendel RR (2013) The molybdenum cofactor. *J Biol Chem* 288(19):13165–13172.
- 351 7. MacGregor CH (1975) Synthesis of nitrate reductase components in chlorate-resistant  
352 mutants of *Escherichia coli*. *J Bacteriol* 121(3):1117–1121.
- 353 8. Reiss J, Hahnewald R (2010) Molybdenum cofactor deficiency: Mutations in GPHN,  
354 MOCS1, and MOCS2. *Hum Mutat* 32(1):10–18.
- 355 9. Huijmans JGM, et al. (2017) Molybdenum cofactor deficiency: Identification of a patient  
356 with homozygote mutation in the MOCS3 gene. *Am J Med Genet* 173(6):1601–1606.
- 357 10. Veldman A, et al. (2010) Successful Treatment of Molybdenum Cofactor Deficiency Type  
358 A With cPMP. *PEDIATRICS* 125(5):e1249–e1254.
- 359 11. Warnhoff K, Ruvkun G (2019) Molybdenum cofactor transfer from bacteria to nematode  
360 mediates sulfite detoxification. *Nature Chemical Biology* 15(5):480–488.
- 361 12. Namgung B, Kim J-H, Song WS, Yoon S-I (2018) Crystal structure of the  
362 hydroxylaminopurine resistance protein, YiiM, and its putative molybdenum cofactor-  
363 binding catalytic site. *Sci Rep* 8(1):3304–12.
- 364 13. Kozmin SG, Leroy P, Pavlov YI, Schaaper RM (2008) YcbX and yiiM, two novel  
365 determinants for resistance of *Escherichia coli* to N-hydroxylated base analogues. *Mol*  
366 *Microbiol* 68(1):51–65.
- 367 14. Witte CP, Igeño MI, Mendel R, Schwarz G, Fernández E (1998) The *Chlamydomonas*  
368 *reinhardtii* MoCo carrier protein is multimeric and stabilizes molybdopterin cofactor in a  
369 molybdate charged form. *FEBS Lett* 431(2):205–209.
- 370 15. Fischer K, et al. (2005) Structural basis of eukaryotic nitrate reduction: crystal structures of  
371 the nitrate reductase active site. *Plant Cell* 17(4):1167–1179.
- 372 16. Hercher TW, Krausze J, Kirk ML, Kruse T (2020) The *Volvox carteri* Moco carrier protein:  
373 Biochemical and structural aspects. In revision at *Bioscience Reports*.

- 374 17. Enroth C, Eger BT, Okamoto K, Nishino T, Pai EF (2000) Crystal structures of bovine milk  
375 xanthine dehydrogenase and xanthine oxidase: structure-based mechanism of  
376 conversion. *Proc Natl Acad Sci USA* 97(20):10723–10728.
- 377 18. Hille R, Hall J, Basu P (2014) The mononuclear molybdenum enzymes. *Chem Rev*  
378 114(7):3963–4038.
- 379 19. Schwarz G (2016) Molybdenum cofactor and human disease. *Curr Opin Chem Biol*  
380 31:179–187.
- 381 20. Johnson JL, Hainline BE, Rajagopalan KV (1980) Characterization of the molybdenum  
382 cofactor of sulfite oxidase, xanthine, oxidase, and nitrate reductase. Identification of a  
383 pteridine as a structural component. *J Biol Chem* 255(5):1783–1786.
- 384 21. Hercher TW, et al. (2020) Insights into the Cnx1E catalyzed MPT-AMP hydrolysis. *Biosci*  
385 *Rep* 40(1). doi:10.1042/BSR20191806.
- 386 22. Mudd SH, Irreverre F, Laster L (1967) Sulfite oxidase deficiency in man: demonstration of  
387 the enzymatic defect. *Science* 156(3782):1599–1602.
- 388 23. Thompson O, et al. (2013) The million mutation project: a new approach to genetics in  
389 *Caenorhabditis elegans*. *Genome Research* 23(10):1749–1762.
- 390 24. Brenner S (1974) The genetics of *Caenorhabditis elegans*. *Genetics* 77(1):71–94.
- 391 25. Baba T, et al. (2006) Construction of *Escherichia coli* K-12 in-frame, single-gene knockout  
392 mutants: the Keio collection. *Mol Syst Biol* 2:1–11.
- 393 26. Palmer T, et al. (1996) Involvement of the narJ and mob gene products in distinct steps in  
394 the biosynthesis of the molybdoenzyme nitrate reductase in *Escherichia coli*. *Mol*  
395 *Microbiol* 20(4):875–884.
- 396 27. Stewart V, MacGregor CH (1982) Nitrate reductase in *Escherichia coli* K-12: involvement  
397 of chlC, chlE, and chlG loci. *J Bacteriol* 151(2):788–799.
- 398 28. Neumann M, Stöcklein W, Walburger A, Magalon A, Leimkühler S (2007) Identification of  
399 a *Rhodobacter capsulatus* L-cysteine desulfurase that sulfurates the molybdenum  
400 cofactor when bound to XdhC and before its insertion into xanthine dehydrogenase.  
401 *Biochemistry* 46(33):9586–9595.

402  
403  
404  
405  
406  
407  
408  
409

410 **Figure Legends:**

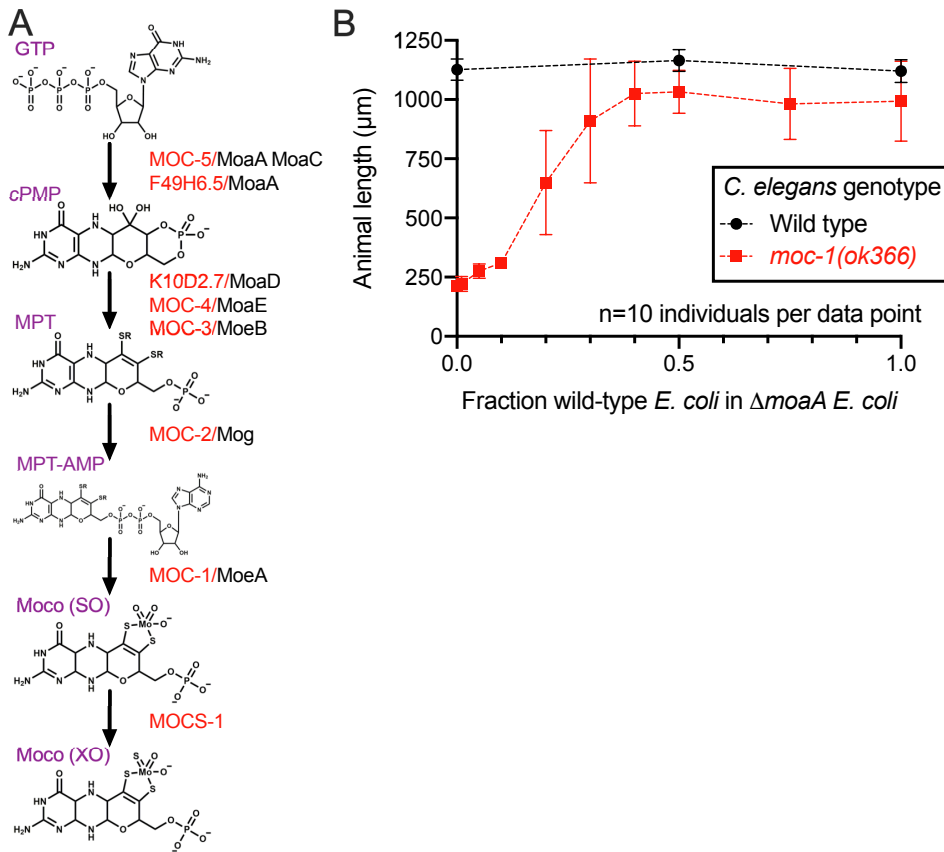

411  
412 **Figure 1: *C. elegans* acquires Moco from dietary *E. coli*.**

413 (A) Based on clear protein sequence homologies, the *C. elegans* Moco biosynthesis pathway  
414 (red) and orthologous enzymes in *E. coli* (black) are displayed. Moco and its biosynthetic  
415 intermediates are displayed (purple): GTP is guanosine triphosphate, cPMP is cyclic  
416 pyranopterin monophosphate, MPT is molybdopterin, MPT-AMP is MPT-adenine  
417 monophosphate, Moco (SO) is the sulfite oxidase form of the molybdenum cofactor, and Moco  
418 (XO) is the xanthine oxidase form of the molybdenum cofactor. *C. elegans* Moco sulfurase  
419 (MOCS-1) has no clear homolog in *E. coli*, although *xdhC* is the likely functional analog (28). (B)  
420 Wild-type and *moc-1(ok366)* *C. elegans* were synchronized at the L1 stage and cultured on  
421 mixtures of wild-type *E. coli* (synthesizes Moco) and  $\Delta moaA$  *E. coli* (cannot synthesize Moco) for  
422 72 hours. When the bacterial diet was all wild-type *E. coli*, both wild-type and *moc-1(ok366)* *C.*  
423 *elegans* grew and developed well. When the bacterial diet was all  $\Delta moaA$  *E. coli*, wild-type  
424 animals grew well while *moc-1(ok366)* animals arrested growth early in larval development. The  
425 Y axis shows animal length ( $\mu\text{m}$ ), where 1,000 $\mu\text{m}$  roughly corresponds with fertile adulthood  
426 and 250 $\mu\text{m}$  roughly corresponds to the L1 stage. Average and standard deviation are displayed  
427 for each condition analyzed. Sample size (n) was 10 individual animals assayed for each  
428 condition.

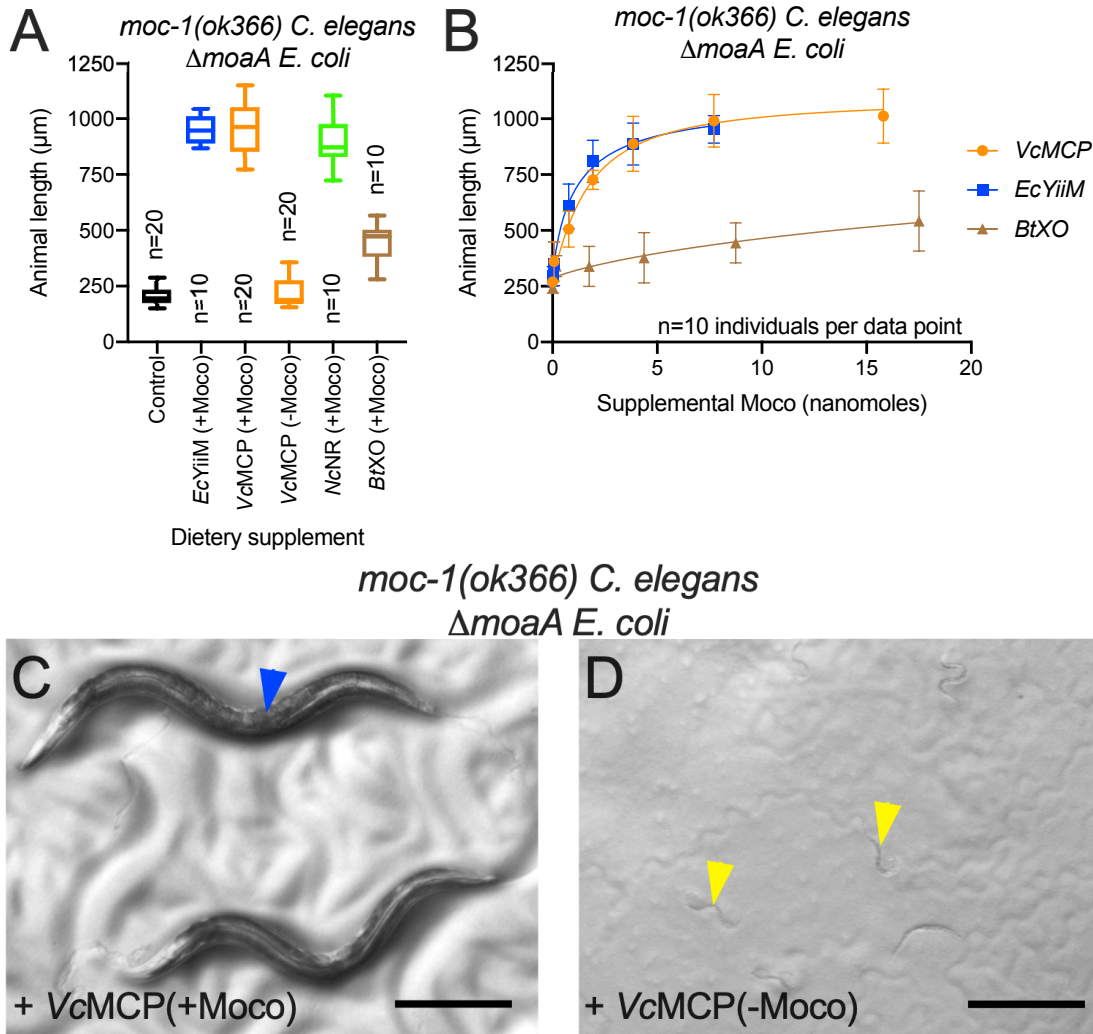

429

430 **Figure 2:** *C. elegans* uses Moco from diverse Moco-containing proteins.

431 (A) *moc-1(ok366)* mutant *C. elegans* were synchronized at the L1 stage and cultured for 72  
 432 hours on *ΔmoaA E. coli* supplemented with Moco bound to *Escherichia coli* YiiM (*EcYiiM*),  
 433 *Volvox carteri* Moco carrier protein (*VcMCP*), *Neurospora crassa* nitrate reductase (*NcNR*), or  
 434 bovine xanthine oxidase (*BtXO*), or equivalent amounts of *VcMCP* purified from bacteria that  
 435 cannot synthesize Moco (-Moco). *EcYiiM*, *VcMCP*, and *NcNR* (+Moco) each contained 7.7  
 436 nanomoles of Moco while *BtXO* (+Moco) contained 8.8 nanomoles of Moco. The Y axis is length  
 437 (μm), where 1,000μm roughly corresponds with fertile adulthood and 250μm roughly  
 438 corresponds to the L1 stage. Box plots display the median, upper, and lower quartiles while  
 439 whiskers indicate minimum and maximum data points. Sample size (n) is displayed for each  
 440 experiment. (B) *moc-1(ok366)* mutant *C. elegans* were synchronized at the L1 stage and  
 441 cultured on *ΔmoaA E. coli* supplemented with variable amounts of Moco bound to *EcYiiM*  
 442 (0.0077, 0.077, 0.77, 1.93, 3.85, or 7.7 nanomoles of Moco, blue), *VcMCP*, (0.0077, 0.077, 0.77,  
 443 1.93, 3.85, 7.7, or 15.8 nanomoles of Moco, orange) or *BtXO* (0.018, 0.18, 1.8, 4.38, 8.75, or

444 17.5 nanomoles of Moco, brown). For each experiment, animals were allowed to develop for 72  
445 hours and animal lengths were determined. Mean and standard deviation are displayed for each  
446 data point. Sample size (n) was 10 individuals assayed for each data point. (C,D)  
447 Representative images of *moc-1(ok366)* *C. elegans* cultured for 72 hours on  $\Delta moaA$  *E. coli*  
448 supplemented with (C) 7.7 nanomoles of Moco bound to VcMCP or (D) equivalent amounts of  
449 apo-VcMCP (-Moco). Blue arrowhead indicates a gravid fertile adult with embryos in its uterus,  
450 while yellow arrowheads denote animals arrested early in larval development. Scale bar is  
451 250 $\mu$ m.

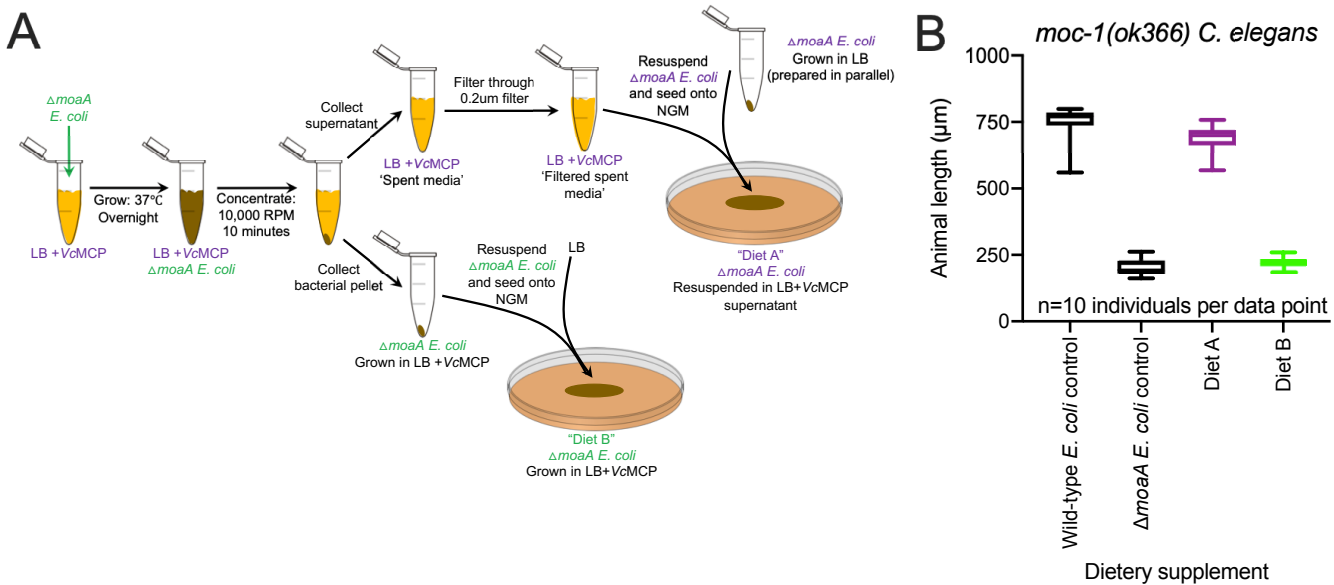

452

453 **Figure 3:** Protein-bound Moco is directly ingested by *C. elegans*

454 (A) Cartoon of the experimental protocol used to generate “Diet A” and “Diet B” in Figure 3B.

455 Briefly  $\Delta moaA$  mutant *E. coli* was cultured overnight at 37°C in 500 $\mu$ l of LB supplemented with

456 39 nanomoles of VcMCP-bound Moco. The bacterial cells were then concentrated, washed,

457 resuspended in LB, and seeded onto NGM to be fed to *moc-1(ok366)* *C. elegans* (“Diet B”,

458 green). The supernatant from this culture (spent LB+VcMCP media) was then filtered (0.2  $\mu$ m

459 filter) to remove remaining bacterial cells and used to resuspend a separate culture of  $\Delta moaA$

460 mutant *E. coli* that was grown only in LB. This was then seeded onto NGM to be fed to *moc-*

461 *1(ok366)* *C. elegans* (“Diet A”, purple). (B) *moc-1(ok366)* mutant *C. elegans* were synchronized

462 at the L1 stage and cultured on Wild-type *E. coli*,  $\Delta moaA$  *E. coli*, “Diet A”, or “Diet B” (see Figure

463 3A for Diet A and B descriptions). For each experiment, animals were allowed to develop for 48

464 hours. Box plots display the median, upper, and lower quartiles while whiskers indicate

465 minimum and maximum data points. Sample size (n) was 10 individuals assayed for each

466 experiment.

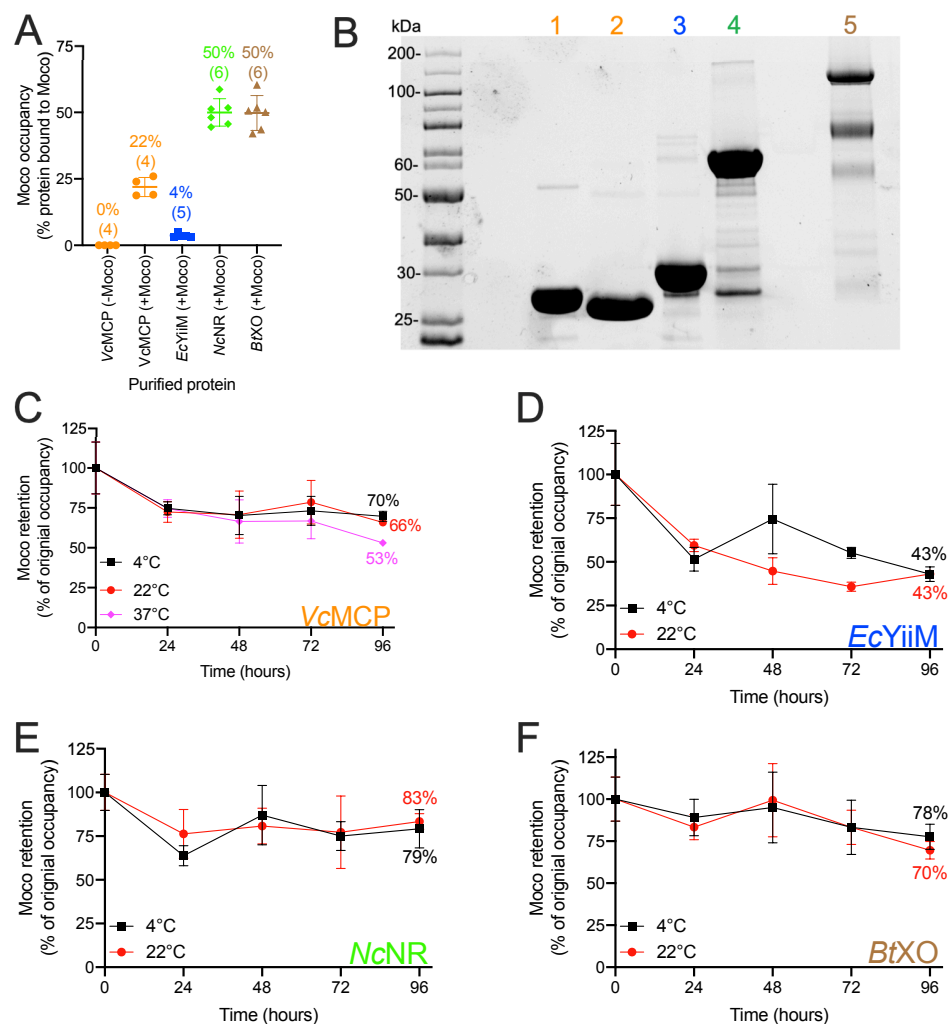

467

468 **Figure 4: Stability of protein-bound Moco.**

469 (A) Moco occupancies for purified *EcYiiM*, *VcMCP*, *NcNR*, and *BtXO* were determined by  
 470 measurements of the Moco-derivative Form A and protein concentration. Moco occupancy is the  
 471 percentage of protein molecules that are bound by a Moco prosthetic group. Moco occupancy  
 472 was determined for *VcMCP* purified from Moco-producing (+Moco) and Moco-deficient (-Moco)  
 473 *E. coli*. The sample size (n) is displayed for each protein and each data point is individually  
 474 presented with the mean and standard deviation. (B) Protein gel demonstrating the purity of [1]  
 475 *VcMCP* purified from Moco-deficient *E. coli*, [2] *VcMCP*, [3] *EcYiiM*, and [4] *NcNR* purified from  
 476 Moco-producing *E. coli*, and [5] *BtXO* purified from bovine milk (Sigma-Aldrich). The gel displays  
 477 all protein using the TGX Stain-Free system (Bio-Rad). (C-F) The amount of stable Moco  
 478 retained by (C) *VcMCP*, (D) *EcYiiM*, (E) *NcNR*, and (F) *BtXO* was determined over 96 hours at  
 479 4°C (black) or 22°C (red). Moco retention of *VcMCP* was also assessed at 37°C (pink). The Y-  
 480 axis displays the Moco retention as a percentage of the original Moco occupancies (time 0)  
 481 presented in Figure 4A. The sample size (n) is 3-6 replicates per protein and time point. The  
 482 mean and standard deviation are displayed.



483 **Supplemental Materials:**

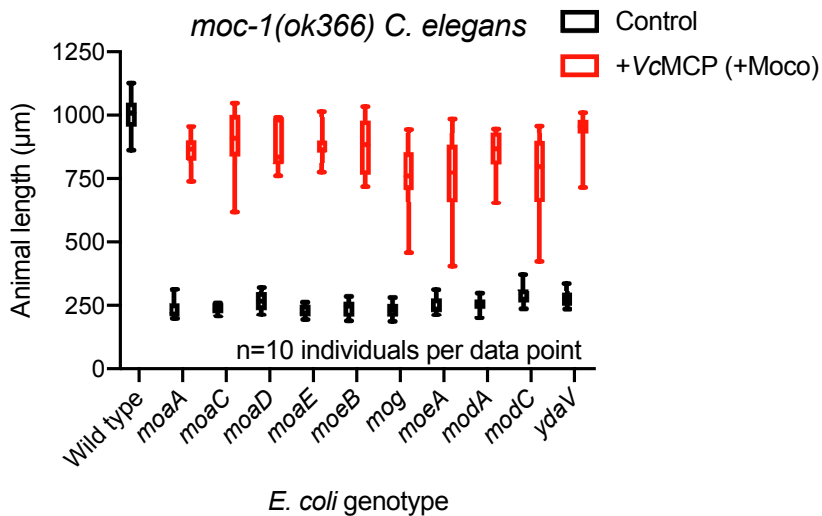

484

485 **Figure S1:** *E. coli* Moco-biosynthetic enzymes are not necessary for uptake of supplemental  
486 protein-bound Moco by *C. elegans*.

487 *moc-1(ok366)* mutant *C. elegans* were synchronized at the L1 stage and cultured on wild-type  
488 or mutant *E. coli* for 72 hours. Each growth assay performed with mutant *E. coli* was done with  
489 or without 3.3 nanomoles of supplemental Moco bound to VcMCP. The Y axis shows animal  
490 length (µm), where 1,000µm roughly corresponds with fertile adulthood and 250µm roughly  
491 corresponds to the L1 stage. Box plots display the median, upper, and lower quartiles while  
492 whiskers indicate minimum and maximum data points. Sample size (n) was 10 individuals  
493 assayed for each experiment.

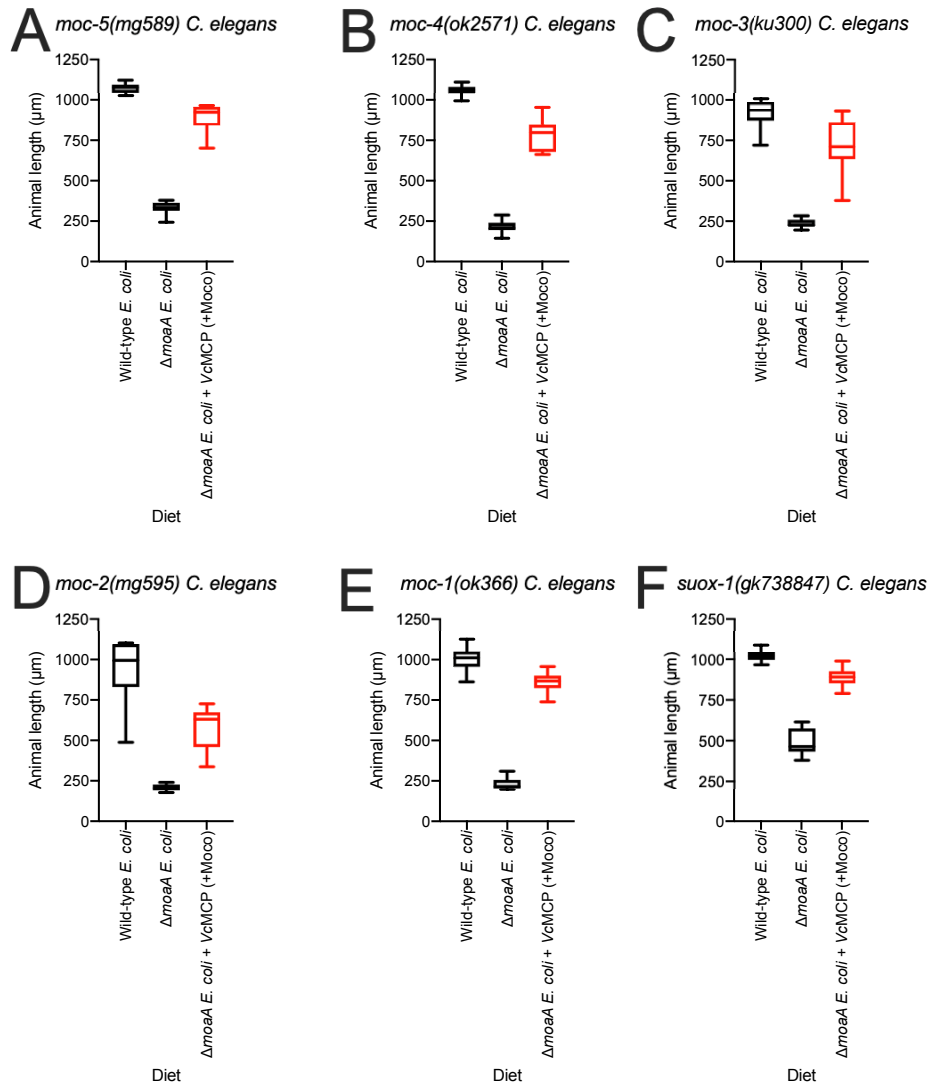

494

495 **Figure S2:** *C. elegans* Moco-biosynthetic enzymes are not necessary for uptake of  
496 supplemental protein-bound Moco.

497 (A) *moc-5(mg589)*, (B) *moc-4(ok2571)*, (C) *moc-3(ku300)*, (D) *moc-2(mg595)*, (E) *moc-1(ok366)*  
498 and (F) *suox-1(gk738847)* mutant animals were cultured from synchronized L1 larvae for 72  
499 hours on wild-type,  $\Delta moaA$  *E. coli*, or  $\Delta moaA$  *E. coli* supplemented with 3.3 nanomoles of Moco  
500 bound to VcMCP. The Y axis shows animal length (μm), where 1,000μm roughly corresponds  
501 with fertile adulthood and 250μm roughly corresponds to the L1 stage. Box plots display the  
502 median, upper, and lower quartiles while whiskers indicate minimum and maximum data points.  
503 Sample size (n) was 10 individuals assayed for each experiment.
